# Supplementary material for: Manipulation of cytokine secretion in human dendritic cells using glycopolymers with picomolar affinity for DC-SIGN
Source: Royal Society of Chemistry journal article supplement (doi:10.1039/c7sc01515a), 2017-01-01
Supplement: c7sc01515a1.pdf [file c7sc01515a1.pdf]

## **ELECTRONIC SUPPORTING INFORMATION**

# Manipulation of Cytokine Secretion in Human Dendritic Cells using Glycopolymers with Picomolar Affinity for DC-SIGN

Daniel A. Mitchell<sup>1,2\*</sup>, Qiang Zhang<sup>3</sup>, Lenny Voorhaar<sup>3</sup>, David M. Haddleton<sup>3</sup>,  
Shan Herath<sup>4</sup>, Anne S. Gleinich<sup>1</sup>, Harpal S. Randeva<sup>1,2</sup>, Max Crispin<sup>5</sup>, Hendrik  
Lehnert<sup>6</sup>, Russell Wallis<sup>7</sup>, Steven Patterson<sup>4</sup> & C. Remzi Becer<sup>8\*</sup>

<sup>1</sup> Clinical Sciences Research Laboratories, University of Warwick, Coventry CV2 2DX, UK

<sup>2</sup> University Hospital Coventry & Warwickshire NHS Trust, Coventry CV2 2DX, UK

<sup>3</sup> Department of Chemistry, University of Warwick, Coventry CV4 7AL, UK

<sup>4</sup> Chelsea & Westminster Hospital, Imperial College School of Medicine, London SW10 9NH,  
UK

<sup>5</sup> Glycobiology Institute, University of Oxford, Oxford OX1 3QU, UK

<sup>6</sup> Universität zu Lübeck, 23562 Lübeck, Germany

<sup>7</sup> Department of Biochemistry, University of Leicester, Leicester LE1 9HN, UK

<sup>8</sup> Polymer Chemistry Laboratory, School of Engineering and Materials Science, Queen Mary  
University, London E1 4NS, UK

Corresponding authors: [d.mitchell@warwick.ac.uk](mailto:d.mitchell@warwick.ac.uk) or [r.becer@qmul.ac.uk](mailto:r.becer@qmul.ac.uk)

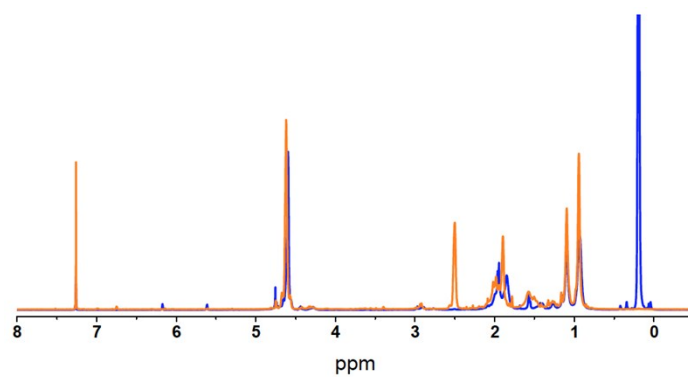

**Figure S1.**  $^1\text{H}$  NMR of linear pTMSMA before (blue line) and after deprotection (orange line) measured in  $\text{CDCl}_3$ .

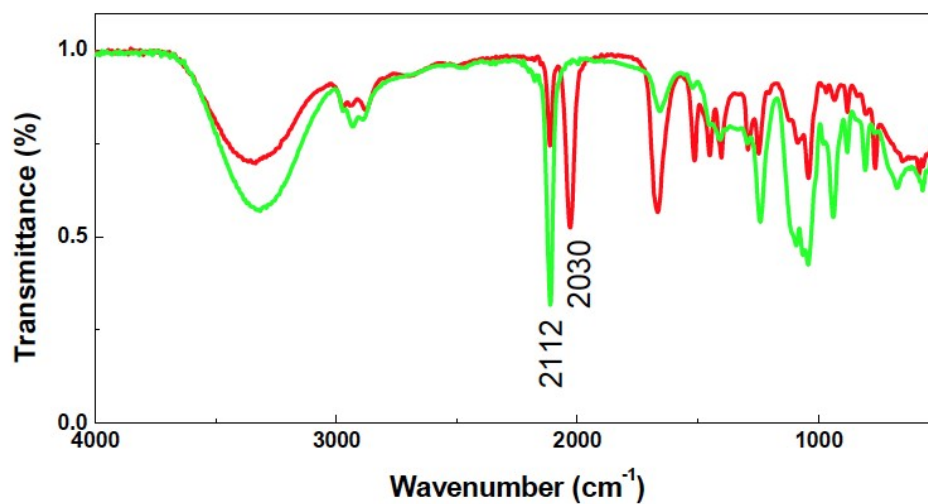

**Figure S2.** FT-IR spectra of mannose azide after filtering out the sodium azide (red line) and after purification on an Amberlite column (green line).

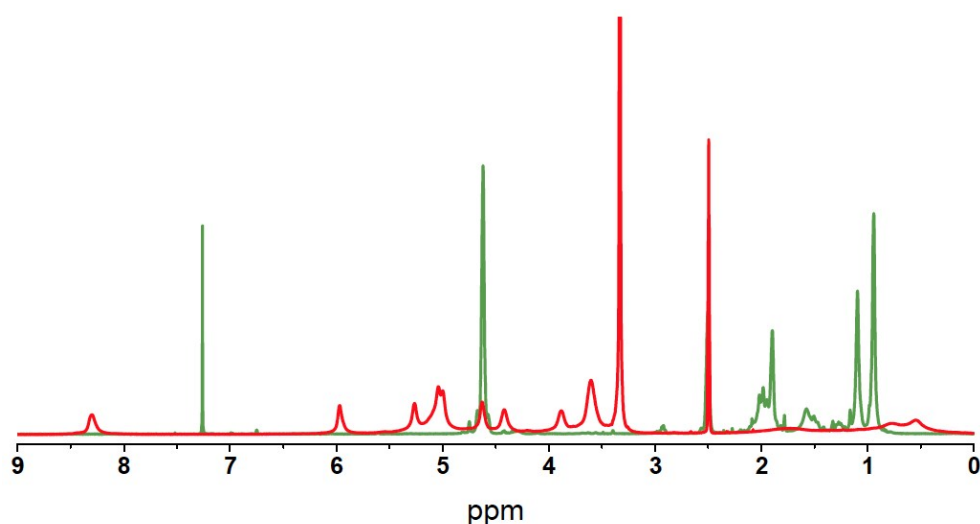

**Figure S3.**  $^1\text{H}$  NMR spectra of p(propargyl MA) in  $\text{CDCl}_3$  (green line) and mannose azide clicked polymer in  $\text{DMSO-d}_6$  (red line).

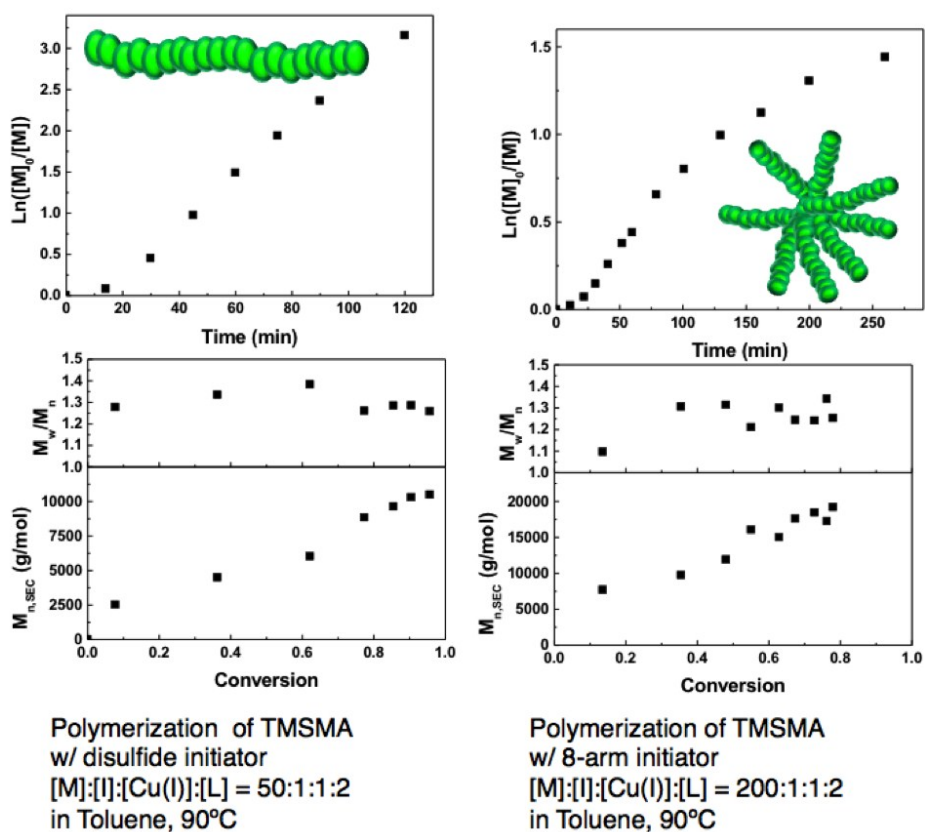

**Figure S4.** Atom transfer radical polymerization kinetics of TMSMA homopolymer, DEGMA-TMSMA random copolymer and TMSMA 8-arm star shaped homopolymer.

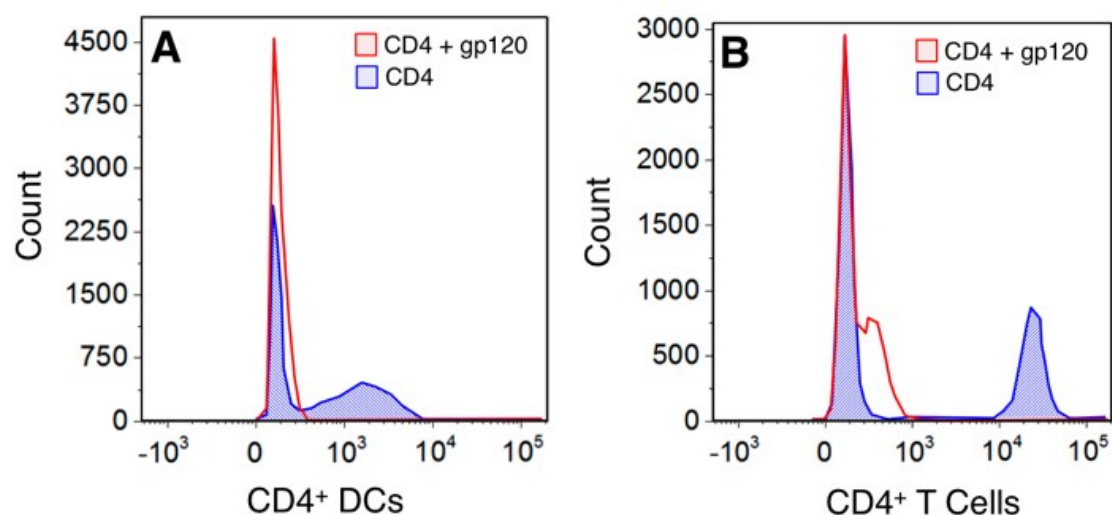

**Figure S5.** Competition binding of gp120 against CD4. Dendritic cells and lymphocytes were first incubated with an unlabeled gp120 and then stained with an anti-CD4 antibody. Cells were analyzed by flow cytometry and the data represents one of 2 donors.
